# Supplementary material
Source: PubMed Central journal article supplement (PMC2151695)
Supplement: plntphys_pp.107.105346_2.pdf [file plntphys_pp.107.105346_2.pdf]

### **Supplemental Figure 1**

Immunoblots comparing expression of AP3 and PI transgenes *in planta*. (IL) refers to transgenic lines generated by Lamb and Irish (Lamb and Irish, 2003). (A) The immunoblot in the top panel is probed with  $\alpha$ -AP3 sera. In the lower panel, the blot was stripped and re-probed with  $\alpha$ -ACC oxidase (~37 Kd) as a loading control. The top arrow points to endogenous AP3, the second arrow points to AP3 $\Delta$ C198, the third arrow points to AP3 $\Delta$ C, and the bottom arrow points to AP3 $\Delta$ C156. (B) The protein blot in the top panel is probed with  $\alpha$ -PI sera. In the lower panel, the blot was stripped and re-probed with  $\alpha$ -ACC oxidase as a loading control. The top arrow points to endogenous PI, the middle arrow points to PI $\Delta$ C185, and the bottom arrow points to PI $\Delta$ C176.
