# Supplementary material
Source: PubMed Central journal article supplement (PMC2151695)
Supplement: plntphys_pp.107.105346_3.pdf [file plntphys_pp.107.105346_3.pdf]

**Supplemental Table 1 – Phenotype of flowers containing *AP3* truncations**

| Genotype                    | n   | Number of organs per flower |      |      |   |         |      |      |     |           |      |      |     |     |
|-----------------------------|-----|-----------------------------|------|------|---|---------|------|------|-----|-----------|------|------|-----|-----|
|                             |     | Whorl 1                     |      |      |   | Whorl 2 |      |      |     | Whorl 3/4 |      |      |     |     |
|                             |     | se                          | p/se | se/p | p | se      | p/se | se/p | p   | st        | c/st | st/c | c   | f   |
| p35S::AP3                   | 79  | 4                           | 0    | 0    | 0 | 0       | 0    | 0    | 4   | 7.4       | 0.9  | 0.6  | 0.6 | 0   |
| p35S::AP3ΔC198              | 103 | 4                           | 0    | 0    | 0 | 0       | 0    | 0    | 4   | 6.4       | 3.3  | 2    | 0   | 0   |
| p35S::AP3ΔC                 | 87  | 4                           | 0    | 0    | 0 | 0       | 0    | 0    | 4   | 6.4       | 0.7  | 1.3  | 0.3 | 0   |
| p35S::AP3ΔC174              | 103 | 4                           | 0    | 0    | 0 | 0       | 0    | 0    | 4   | 5.1       | 1.6  | 2.7  | 0   | 0   |
| p35S::AP3ΔC156              | 87  | 4                           | 0    | 0    | 0 | 0       | 0    | 0    | 4   | 6         | 0    | 0    | 1   | 0   |
| p35S::AP3 <i>ap3-3</i>      | 72  | 4                           | 0    | 0    | 0 | 0       | 1.9  | 1.1  | 1.3 | 3.5       | 2.6  | 1.3  | 3.5 | 0   |
| p35S::AP3ΔC198 <i>ap3-3</i> | 81  | 4                           | 0    | 0    | 0 | 0       | 4    | 0    | 0   | 6.4       | 1.6  | 2    | 0.1 | 0   |
| p35S::AP3ΔC <i>ap3-3</i>    | 63  | 4                           | 0    | 0    | 0 | 2.6     | 1.4  | 0    | 0   | 6.2       | 0.7  | 1.6  | 0.2 | 0   |
| p35S::AP3ΔC174 <i>ap3-3</i> | 55  | 4                           | 0    | 0    | 0 | 0       | 0    | 1.3  | 2.7 | 7.3       | 0.3  | 2.2  | 0.5 | 0   |
| p35S::AP3ΔC156 <i>ap3-3</i> | 79  | 4                           | 0    | 0    | 0 | 4       | 0    | 0    | 0   | 0         | 0    | 0    | 1   | 0   |
| pAP3::AP3ΔC198 <i>ap3-3</i> | 73  | 4                           | 0    | 0    | 0 | 0       | 4    | 0    | 0   | 0         | 0    | 0    | 1   | 0.7 |
| pAP3::AP3ΔC174 <i>ap3-3</i> | 102 | 4                           | 0    | 0    | 0 | 0       | 0    | 4    | 0   | 3.5       | 1.9  | 0    | 0   | 0   |
| pAP3::AP3ΔC156 <i>ap3-3</i> | 105 | 4                           | 0    | 0    | 0 | 4       | 0    | 0    | 0   | 0         | 0    | 0.4  | 1   | 0.6 |

se:sepal, p/se: petaloid sepal, se/p: sepaloid petal, p:petal, st:stamen, c/st: carpeloid stamen,  
st/c: stamenoid carpel, c: carpel, f:filament, n: number of flowers scored
