# Supplementary material
Source: PubMed Central journal article supplement (PMC2151695)
Supplement: plntphys_pp.107.105346_4.pdf [file plntphys_pp.107.105346_4.pdf]

**Supplemental Table 2 – Phenotype of flowers containing *PI* truncations**

| Genotype                  | n   | Number of organs per flower |      |      |   |         |      |      |     |         |      |      |   |         |     |
|---------------------------|-----|-----------------------------|------|------|---|---------|------|------|-----|---------|------|------|---|---------|-----|
|                           |     | Whorl 1                     |      |      |   | Whorl 2 |      |      |     | Whorl 3 |      |      |   | Whorl 4 |     |
|                           |     | se                          | p/se | se/p | p | se      | p/se | se/p | p   | st      | c/st | st/c | c | c       | f   |
| p35S::PI                  | 167 | 0                           | 0    | 4    | 0 | 0       | 0    | 0    | 4   | 6       | 0    | 0    | 0 | 1       | 0   |
| p35S::PIΔC185             | 122 | 0                           | 0    | 4    | 0 | 0       | 0    | 0    | 4   | 6       | 0    | 0    | 0 | 1       | 0   |
| p35S::PIΔC                | 95  | 0                           | 0    | 4    | 0 | 0       | 0    | 0    | 4   | 6       | 0    | 0    | 0 | 1       | 0   |
| p35S::PIΔC176             | 78  | 0                           | 0.8  | 3.2  | 0 | 0       | 0    | 0    | 4   | 6       | 0    | 0    | 0 | 1       | 0   |
| p35S::PIΔC155             | 97  | 4                           | 0    | 0    | 0 | 0       | 0    | 0    | 4   | 6       | 0    | 0    | 0 | 1       | 0   |
| p35S::PI <i>pi-4</i>      | 95  | 0                           | 0    | 4    | 0 | 0       | 0    | 4    | 0   | 5.8     | 0.2  | 0    | 0 | 1       | 0   |
| p35S::PIΔC185 <i>pi-4</i> | 88  | 0                           | 0    | 4    | 0 | 0       | 0    | 4    | 0   | 1.6     | 2.5  | 1.5  | 0 | 1       | 0.1 |
| p35S::PIΔC <i>pi-4</i>    | 78  | 0                           | 0    | 4    | 0 | 0       | 0    | 0    | 4   | 5.8     | 0.2  | 0    | 0 | 1       | 0   |
| p35S::PIΔC176 <i>pi-4</i> | 93  | 0                           | 2.4  | 1.6  | 0 | 0       | 0    | 0.6  | 3.4 | 0       | 1.6  | 3.6  | 0 | 1       | 2.8 |
| p35S::PIΔC155 <i>pi-4</i> | 95  | 4                           | 0    | 0    | 0 | 4       | 0    | 0    | 0   | 0       | 0    | 1.2  | 0 | 1       | 0   |
| pAP3::PIΔC185             | 102 | 0                           | 0.1  | 3.9  | 0 | 0       | 0    | 0    | 4   | 6       | 0    | 0    | 0 | 1       | 0   |
| pAP3::PIΔC176             | 111 | 0                           | 0    | 4    | 0 | 0       | 0    | 0    | 4   | 6       | 0    | 0    | 0 | 1       | 0   |
| pAP3::PIΔC155             | 89  | 3.2                         | 0.6  | 0    | 0 | 0       | 0    | 0    | 4   | 6       | 0    | 0    | 0 | 1       | 0   |
| pAP3::PIΔC185 <i>pi-4</i> | 79  | 0                           | 0.9  | 3.1  | 0 | 0       | 1.4  | 2.1  | 0.7 | 1.4     | 3    | 1.1  | 0 | 1       | 0   |
| pAP3::PIΔC176 <i>pi-4</i> | 82  | 0                           | 0    | 4    | 0 | 0       | 0    | 4    | 0   | 0       | 4.2  | 0.9  | 0 | 1       | 0   |
| pAP3::PIΔC155 <i>pi-4</i> | 103 | 4                           | 0    | 0    | 0 | 4       | 0    | 0    | 0   | 0       | 0    | 3.70 | 0 | 1       | 0   |

se:sepal, p/se: petaloid sepal, se/p: sepaloid petal, p:petal, st:stamen, c/st: carpeloid stamen, st/c: stamenoid carpel, c: carpel, f:filament, n: number of flowers scored
