# Supplementary material
Source: PubMed Central journal article supplement (PMC2151695)
Supplement: plntphys_pp.107.105346_5.pdf [file plntphys_pp.107.105346_5.pdf]

**Supplementary Table 3 – Transgenic lines generated**

| <b>Genotype</b>             | <b>Total Lines</b> | <b>Strength of Phenotype (percentage of lines)</b> |          |            |          |            |          |          |
|-----------------------------|--------------------|----------------------------------------------------|----------|------------|----------|------------|----------|----------|
|                             |                    | <b>Lines Analyzed</b>                              | <b>S</b> | <b>I/S</b> | <b>I</b> | <b>I/W</b> | <b>W</b> | <b>N</b> |
| <sup>a</sup> p35S::AP3ΔC198 | 26                 | 26                                                 | 23       | 42         | 19       | 8          | 8        | 0        |
| <sup>a</sup> p35S::AP3ΔC    | ~10                | 1                                                  | 0        | 100        | 0        | 0          | 0        | 0        |
| <sup>a</sup> p35S::AP3ΔC174 | 4                  | 4                                                  | 0        | 100        | 0        | 0          | 0        | 0        |
| <sup>a</sup> p35S::AP3ΔC156 | 13                 | 13                                                 | 0        | 0          | 0        | 0          | 15       | 85       |
| <sup>b</sup> pAP3::AP3ΔC198 | 41                 | 25                                                 | 0        | 0          | 0        | 0          | 0        | 100      |
| <sup>b</sup> pAP3::AP3ΔC174 | 15                 | 11                                                 | 9        | 36         | 0        | 27         | 27       | 0        |
| <sup>b</sup> pAP3::AP3ΔC156 | 9                  | 5                                                  | 0        | 0          | 0        | 0          | 0        | 100      |
| <sup>a</sup> p35S::PIΔC185  | 3                  | 3                                                  | 100      | 0          | 0        | 0          | 0        | 0        |
| <sup>a</sup> p35S::PIΔC     | ~10                | 1                                                  | 100      | 0          | 0        | 0          | 0        | 0        |
| <sup>a</sup> p35S::PIΔC176  | 12                 | 12                                                 | 0        | 58         | 0        | 42         | 0        | 0        |
| <sup>a</sup> p35S::PIΔC155  | 47                 | 47                                                 | 0        | 0          | 0        | 0          | 0        | 100      |
| <sup>b</sup> pAP3::PIΔC185  | 32                 | 19                                                 | 0        | 37         | 26       | 16         | 21       | 0        |
| <sup>b</sup> pAP3::PIΔC176  | 20                 | 9                                                  | 0        | 44         | 33       | 22         | 11       | 0        |
| <sup>b</sup> pAP3::PIΔC155  | 9                  | 9                                                  | 0        | 0          | 0        | 0          | 0        | 100      |

S: strong, I/S: intermediate/strong, I: intermediate, I/W: intermediate/weak, W: weak, N: no phenotype

<sup>a</sup>p35S lines – scored for strength of ectopic expression phenotype

<sup>b</sup>pAP3 lines – scored strength of mutant rescue
