# Supplementary material
Source: PubMed Central journal article supplement (PMC2151695)
Supplement: plntphys_pp.107.105346_6.pdf [file plntphys_pp.107.105346_6.pdf]

**Supplementary Table 4 - Primers sequences**

| <b>Construct</b> | <b>Name</b> | <b>Sequence</b> <sup>a,b</sup>                 |
|------------------|-------------|------------------------------------------------|
| AP3-ATG          | TJ910       | 5'- <b>AGGATCCT</b> TATGGCGAGAGGGAAGAT-3'      |
| AP3ΔC            | TJ514       | 5'-GAGCTGAAGATTAACACTATGGACT-3'                |
| AP3ΔC            | TJ515       | 5'-AGTCCATAGTGTTAATCTTCAGCTC-3'                |
| AP3Δ198          | TJ920       | 5'-G <b>AGGATCCT</b> ATTAACGTGACCCTTCG-3'      |
| AP3Δ174          | TJ918       | 5'-GT <b>GGATCCT</b> GTTAATCTTCAGCTCTTAG-3'    |
| AP3Δ156          | TJ913       | 5'- <b>TAGGATCCT</b> TAACTTTTGTCTTTTTCTTGGT-3' |
| PI-ATG           | TJ914       | 5'-AG <b>GGATCC</b> CAGATGGGTAGAGGAAAG-3'      |
| PIΔC             | TJ520       | 5'-GCAACGCAAGATGAATGATGATGA-3'                 |
| PIΔC             | TJ521       | 5'-TCATCATCATTCATCTTACGTTGC-3'                 |
| PIΔ185           | TJ915       | 5'-CT <b>GGATCC</b> AAATTACCCATCATGATC-3'      |
| PIΔ176           | TJ919       | 5'-C <b>AGGATCCT</b> TTCATCTTGCGTTGCTTGC-3'    |
| PIΔ155           | TJ917       | 5'-T <b>GGGATCCT</b> TACTCCGCCATCATCTT-3'      |
| <i>ap3-3</i>     | TJ764       | 5'-AGGATAGAGAACCAGACAAACGTA-3'                 |
| <i>ap3-3</i>     | TJ450       | 5'-TAGTGGTTAATTATAAGAAA-3'                     |
| <i>pi-4</i>      | TJ766       | 5'-TCATAATCTTTGCAAGTAATGG-3'                   |
| <i>pi-4</i>      | TJ161       | 5'-GCCATGGAATATTTTTGAGAC-3'                    |

<sup>a</sup> Primers that contain nucleotides that alter AP3/PI sequences are indicated in bold.

<sup>b</sup> Engineered BamHI sites are underlined.
