# Supplementary material
Source: PubMed Central journal article supplement (PMC2151695)

**A**

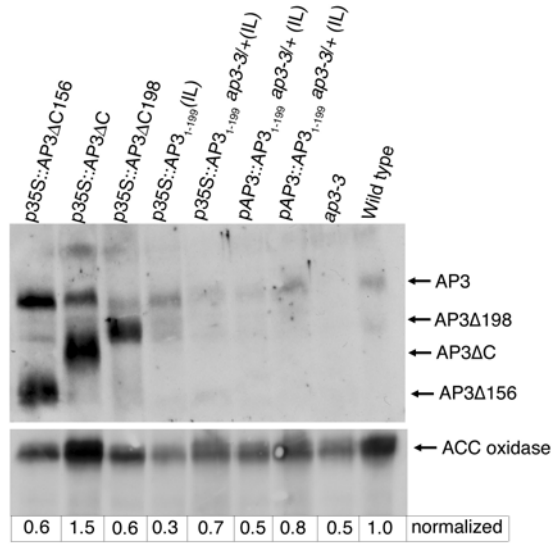

**B**

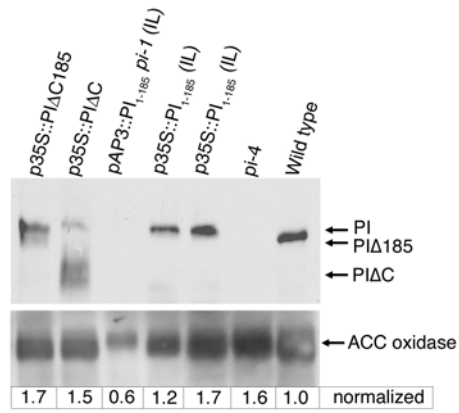

**Supplementary Figure 1**

Supplement: plntphys_pp.107.105346_1.pdf [file plntphys_pp.107.105346_1.pdf]
